# Supplementary material
Source: HighWire-hosted journal article supplement (doi:10.1101/rna.080801.125)
Supplement: Supplemental_Legends_Methods.docx [file Supplemental_Legends_Methods.docx]

**Supplemental Figure Legends**

**Figure S1: Additional nuage colocalization conditions on wildtype *w1***

A-C. Confocal images of nurse cell nucleus showing Vasa staining in *vasRG/PH* mutants, Aub staining in *aubHN/QC* mutants, and Ago3 staining in *ago3t2/t3* mutants respectively. DAPI signal (blue) was used to define the nurse cell nuclei. Scale bar is 2 μm.

D-F. Immunofluorescence for two nuage markers Vasa (green) and Armi (red) in *w1* show prominent Vasa containing granules colocalize with Armi (filled arrow heads). Some Vasa containing granules lack Armi (open arrow heads). Scale bar is 2 μm.

G-I. Immunofluorescence for two nuage markers for Ago3 (green) and GFP:Aub (red) in *w1;;nos:GAL4, UASp:GFP:aub* show high levels of colocalization (filled arrow heads). Scale bar is 2 μm.

J. Density scatterplot comparing of average Ago3 signal vs average Aub signal where each point represents a nuage granule in *w1*. Only granules proximity to nuclear pore signal was used for this analysis. Pearson correlation coefficient was calculated.

K. Violin plot showing distribution of Aub/Ago3 signal ratios.

**Figure S2: Ago3, Vasa colocalization and nuage composition *uap56* single and *mnk, uap56* double mutants**

A-I. Immunofluorescence for Vasa (green) and Ago3 (red), in heterozygous controls, *uap56sz15/28*, and *mnk, uap56sz15/28*double mutants. Scale bar is 2 μm.

J-L. Density scatterplot comparing of average Vasa signal vs average Ago3 signal where each point represents a perinuclear nuage granule for heterozygous controls, *uap56sz15/28*, and *mnk, uap56sz15/28*double mutants respectively. Pearson correlation coefficient was calculated for each genotype.

M. Immunofluorescence for Armi was perfumed in *w1* controls, *uap56sz15/28*, and *mnk, uap56sz15/28*double mutants. Armi localization is depleted from nuage in both *uap56sz15/28*, and *mnk, uap56sz15/28*double mutants. Scale bar is 2 μm.

**Figure S3: Localization of Vasa, Aub, Ago3 and Armi in various piRNA single and *mnk* double mutants reveals dependencies on nuage organization**

A-D. Representative images of WT (*w1* and *mnk*) and various piRNA mutants stained for Vasa (A), Aub (B), Ago3 (C), and Armi (D). Each image is an optical z-section through a nurse cell nucleus. Scale bar is 2 μm.

**Figure S4: nuage still present in many piRNA mutants**

A-D. Electron microscopy images of Stage 3-5 nurse cells for *rhiKG/02*, *thoc7d/Df*, *aubHN/QC*, and *mnk, armi1/72.1* mutants respectively. Electron dense nuage structures designated by the black arrow heads still detected in all genotypes. N (nucleus), C (cytoplasm), and M (mitochondria).

**Figure S5: Transposon mapping piRNA comparisons between single piRNA mutants and *mnk* double mutants reveals Chk2 effect on ping-pong amplification**

A. Scatter plot showing antisense transposon mapping piRNA abundance (log10) for

pair wise comparisons of *mnk*, piRNA single mutant and *mnk* double mutants. The following piRNA mutants were tested*: rhiKG/02*, *thoc7d/Df*, *vasRG/PH*, *aubHN/QC*, *ago3t2/t3*, and *armi1/72.1*. Red points indicate more than two-fold up and blue points show more than two-fold down.

B. Scatter plots showing ping pong z-score (log2) for each transposon family with the same comparisons as above.

C. Graphs showing the distribution of the shortest distance between 3ʹ end of one piRNA and the 5ʹ end of the subsequent piRNA downstream for various piRNA single mutants and *mnk* double mutants. Prominent peak at zero nucleotide is detected for all genotypes tested signifying intact phased piRNA biogenesis.

**Figure S6: Comparisons between single piRNA mutants and *mnk* double mutants for transposon and piRNA cluster expression show a subset of transposons are sensitive to DNA damage signaling**

A. Scatter plot showing pairwise comparisons of transposon expression levels between *mnk*, single piRNA mutants and *mnk* double mutants. The following piRNA mutants were tested*: rhiKG/02*, *thoc7d/Df*, *vasRG/PH*, *aubHN/QC*, *ago3t2/t3*, and *armi1/72.1*. Red and blue points are more than two-fold up or down respectively.

B. Scatterplot showing piRNA cluster expression levels for the same comparisons as above. Each point is a piRNA cluster.

**Figure S7: long and small RNA-seq comparisons to *w1* controls**

Scatter plot showing pairwise comparisons between *w1* the indicted piRNA mutant for (A) antisense mapping transposon piRNAs, (B) transposon ping-pong z-scores, (C) transposon expression, and (D) piRNA cluster precursor expression. Red and blue points are more than two-fold up or down respectively.

**Extended Methods**

Quantifying perinuclear nuage localization script

/*

******* NOTES and READ ME *********

* Language: IJ1 Macro

Things to check/change before running script.

1. Enter full path for output directory in Section 1

2. Change your channel extension (i.e. "_ch00.tif", "_ch01.tif", etc.) and

nuage marker name so the labeled markers are designated properly

in the section 4

3. Change the Date of the experiment in section 4

4. May need to change stringency of thresholding depending on the markers used

in sections 5 and 6. Currently threshold is defined as mean + 4*std but we

have tested mean + 3*std and mean + 5*std. Recommend testing various threshold

conditions to see which best represents the signal observed in the raw data.

5. In Section 5, nuclear periphery is defined by expanding/"Dilate" the nuclear

membrane signal by a set number of pixels. For the magnification we used,

expanding by 7 pixels was optimum to capture entire nuage granule, but you

may need to change this parameter depending on the magnification used.

6. In Section 8, when defining nuage particles, we required each particle to be larger

than 10 pixels. Again, depending on the magnification used, this parameter may

be inappropriate.

7. file folder setup on Windows and Mac are designated a little differently and

you may need to play with sections 1-4 to designate files appropriately

Input file setup:

This script is designed to take the folder containing all the images for a

single nucleus as the input. Be sure that the folder contains the merged image

of all the labeled markers as well as each marker split out into its own channel.

See below for an example where "prefix" is the input folder. prefix_z01.tif,

prefix_z02.tif, etc. are the merged images, and anything with _ch0#.tif are the

split-out channels for each marker. The suffix of each file is how the scripts

designates each marker, if your files suffixes differ, you can modify sections

1-4 accordingly.

prefix/

prefix_z01.tif

prefix_z01_ch00.tif

prefix_z01_ch01.tif

prefix_z01_ch02.tif

prefix_z01_ch03.tif

prefix_z02.tif

prefix_z02_ch00.tif

prefix_z02_ch01.tif

prefix_z02_ch02.tif

prefix_z02_ch03.tif

prefix_z03.tif

prefix_z03_ch00.tif

... etc.

Output files

The average signal for each nuage marker can be found in the files ending with

_perinuclear_results.csv. Each row in the table represents a nuage granule

defined in Section 8. (example: prefix_nuage1_perinuclear_results.csv and

prefix_nuage2_perinuclear_results.csv)

Images containing “threshold_peripheral” show the regions that passed thresholding

for each nuage marker and the regions that are considered perinuclear. Use these

images to optimize conditions for thresholding and defining perinuclear granules.

Images containing “Merge_peripheral” is the image that is used to define regions

of interests.

*/

/* Section 1: pop-up asking for input directory and setting the output directory

*/

print("\\Clear");

input = getDirectory("Input directory");

output = "/Full_path_to/Output_directory";

print ("Input directory: " + input);

print ("Save directory: " + output);

/* Section 2: getting list of prefixes for each slice of the z stack

*/

allnames = getFileList(input)

// for (i=0; i<allnames.length; i++) print(allnames[i]);

for (i=0; i<lengthOf(allnames); i++) {

if (endsWith(allnames[i], "ch00.tif")==false &&

endsWith(allnames[i], "ch01.tif")==false &&

endsWith(allnames[i], "ch02.tif")==false &&

endsWith(allnames[i], "ch03.tif")==false) {

print (allnames[i]);

files = Array.concat(files, allnames[i]);

}

}

files = Array.slice(files,1);

// for (i=0; i<prenames.length; i++) print(prenames[i])

/* Section 3: making directory for output with sorce image name

*/

Directory = replace(files[0],"_z00.tif","");

print(Directory)

File.makeDirectory(output+File.separator+Directory)

setBatchMode(true);

/* Section 4: defining prefixes for saving files and also different channels

for each marker stained

*/

for (i=0; i<lengthOf(files); i++) {

nuage1 = replace(files[i],".tif","_ch01.tif");

nuage1name = "vasa";

nuage2 = replace(files[i],".tif","_ch03.tif");

nuage2name = "ago3";

nup = replace(files[i],".tif","_ch02.tif");

prefix = replace(files[i],".tif","_");

date = "20210110_";

roiManager("reset");

/* Section 5: define nuclear membrane and expanding signal to define nuclear periphery

*/

open(input+File.separator+nup);

run("Subtract Background...", "rolling=50");

getStatistics(area, mean, min, max, std);

threshold = mean + 4*std;

setThreshold(0, threshold);

setOption("BlackBackground", false);

run("Make Binary", "thresholded remaining black");

run("Convert to Mask");

run("Options...", "iterations=1 count=1 do=Nothing");

run("Dilate");

run("Dilate");

run("Dilate");

run("Dilate");

run("Dilate");

run("Dilate");

run("Dilate");

/* Section 6: thresholding both nuage signal

*/

open(input+File.separator+nuage1);

run("Subtract Background...", "rolling=50");

getStatistics(area, mean, min, max, std);

threshold = mean + 4*std;

setThreshold(0, threshold);

setOption("BlackBackground", false);

run("Make Binary", "thresholded remaining black");

run("Convert to Mask");

open(input+File.separator+nuage2);

run("Subtract Background...", "rolling=50");

getStatistics(area, mean, min, max, std);

threshold = mean + 4*std;

setThreshold(0, threshold);

setOption("BlackBackground", false);

run("Make Binary", "thresholded remaining black");

run("Convert to Mask");

/* Section 7: creating images of just peripheral nuage markers

*/

imageCalculator("AND create", nuage1, nup);

selectWindow("Result of "+nuage1);

saveAs("Tiff", output+File.separator+Directory+File.separator+date+"threshold_peripheral_"+nuage1);

imageCalculator("AND create", nuage2, nup);

selectWindow("Result of "+nuage2);

saveAs("Tiff", output+File.separator+Directory+File.separator+date+"threshold_peripheral_"+nuage2);

/* Section 8: merging both peripheral nuage markers for selecting one set of ROIs

*/

roiManager("reset");

imageCalculator("Add create", date+"peripheral_raw_"+nuage1, date+"peripheral_raw_"+nuage2);

selectWindow("Result of "+date+"peripheral_raw_"+nuage1);

saveAs("Tiff", output+File.separator+Directory+File.separator+date+"_Merge_peripheral_"+prefix);

run("Analyze Particles...", "size=10-Infinity pixel exclude summarize add");

/* Section 9: Measure signal of first and second nuage marker

*/

if (roiManager("count") >= 1){

run("Set Measurements...", "area mean standard min integrated median redirect=None decimal=3");

open(input+File.separator+nuage2);

roiManager("Measure");

close();

selectWindow ("Results");

saveAs("Results", output+File.separator+Directory+File.separator+date+prefix+nuage2name+"_perinuclear_results.csv");

run("Close");

open(input+File.separator+nuage1);

roiManager("Measure");

close();

selectWindow ("Results");

saveAs("Results", output+File.separator+Directory+File.separator+date+prefix+nuage1name+"_perinuclear_results.csv");

run("Close");

}

}

setBatchMode(false)

Quantifying Nuclear and cytoplasmic spatial juxtaposition

/*

******* NOTES and READ ME *********

* Language: IJ1 Macro

Things to check/change before running script.

1. Enter full path for output directory in Section 1

2. Change your channel extension (i.e. "_ch00.tif", "_ch01.tif", etc.) to designate

Rhino, nuclear pore and nuage appropriately in the section 4

3. Change the Date of the experiment in section 4

4. May need to change stringency of thresholding depending on the markers used

in sections 5 and 6. Currently threshold is defined as mean + 3*std but we

have tested mean + 4*std and mean + 5*std. Recommend testing various threshold

conditions to see which best represents the signal observed in the raw data.

5. In Section 5, nuclear periphery is defined by expanding/"Dilate" the nuclear

membrane signal by a set number of pixels. For the magnification we used,

expanding by 3 pixels was optimum to capture foci directly adjacent to the

nuclear pore signal but you may need to change this parameter depending on

the magnification used.

6. In Section 8, when defining Rhino particles, we required each particle to be larger

than 5 pixels. Again, depending on the magnification used, this parameter may

be inappropriate.

7. file folder setup on Windows and Mac are designated a little differently and

you may need to play with sections 1-4 to designate files appropriately

Input file setup:

This script is designed to take the folder containing all the images for a

single nucleus as the input. Be sure that the folder contains the merged image

of all the labeled markers as well as each marker split out into its own channel.

See below for an example where "prefix" is the input folder. prefix_z01.tif,

prefix_z02.tif, etc. are the merged images, and anything with _ch0#.tif are the

split-out channels for each marker. The suffix of each file is how the scripts

designates each marker, if your files suffixes differ, you can modify sections

1-4 accordingly.

prefix/

prefix_z01.tif

prefix_z01_ch00.tif

prefix_z01_ch01.tif

prefix_z01_ch02.tif

prefix_z01_ch03.tif

prefix_z02.tif

prefix_z02_ch00.tif

prefix_z02_ch01.tif

prefix_z02_ch02.tif

prefix_z02_ch03.tif

prefix_z03.tif

prefix_z03_ch00.tif

... etc.

Output files

Counting Rhino overlap with Nuage is found in "results_ex#.csv" files. The

each row represents a single Rhino focus or Region of Interest (RIO). Max

column designates whether there is nuage overlap with that RIO.

0 means no overlap and no adjacent localization of nuage

255 means there is overlap and nuage is adjacent to Rhino Focus

Percent of Rhino spatially juxtaposed to nuage can be calculated by counting

the 0s and 255s. Adjacent localization does usually does not result in overlap,

therefore, nuage signal is expanded equally and the overlap with RIOs are

recorded with each expansion. ex0 is no expansion, ex1 is one pixel expansion,

ex2 is two pixle expansion, etc.

Files containing "summary.csv" are the output of particle picker. The first row

contains the number of Rhino added to the RIOs and every subsequent row measures

the number of nuage particles with each expansion.

Images containing “peripheral_raw” show the regions that passed thresholding

and are considered perinuclear. the different channels for each z-section of

these images are merged to create the files containing “composite_raw”. All of

these images can be used to optimize conditions for thresholding and defining

perinuclear ROIs

Images containing "composite_ex#.jpg" are the merged images as the nuage signal

is expanded. This can be used for visual inspection to determine which number

of expansions is appropriate. ex0 is no expansion, ex1 is one pixel expansion,

ex2 is two-pixel exaptation, etc.

*/

/* Section 1: pop-up asking for input directory and setting the output directory

*/

print("\\Clear");

input = getDirectory("Input directory");

output = "/Full_path_to/Output_directory";

print ("Input directory: " + input);

print ("Save directory: " + output);

/* Section 2: getting list of prefixes for each slice of the z stack

*/

allnames = getFileList(input)

// for (i=0; i<allnames.length; i++) print(allnames[i]);

for (i=0; i<lengthOf(allnames); i++) {

if (endsWith(allnames[i], "ch00.tif")==false &&

endsWith(allnames[i], "ch01.tif")==false &&

endsWith(allnames[i], "ch02.tif")==false &&

endsWith(allnames[i], "ch03.tif")==false) {

print (allnames[i]);

files = Array.concat(files, allnames[i]);

}

}

files = Array.slice(files,1);

// for (i=0; i<prenames.length; i++) print(prenames[i])

/* Section 3: making directory for output with sorce image name

*/

Directory = replace(files[0],"_z00.tif","");

print(Directory)

File.makeDirectory(output+File.separator+Directory)

setBatchMode(true);

/* Section 4: defining prefixes for saving files and also different channels

for each marker stained

*/

for (i=0; i<lengthOf(files); i++) {

nuage = replace(files[i],".tif","_ch02.tif");

nup = replace(files[i],".tif","_ch00.tif");

rhi = replace(files[i],".tif","_ch03.tif");

prefix = replace(files[i],".tif","_");

date = "20210911_";

roiManager("reset");

/* Section 5: define nuclear membrane and dilate 3 times to define nuclear periphery

*/

open(input+File.separator+nup);

run("Subtract Background...", "rolling=50");

getStatistics(area, mean, min, max, std);

threshold = mean + 3*std;

setThreshold(0, threshold);

setOption("BlackBackground", false);

run("Make Binary", "thresholded remaining black");

run("Convert to Mask");

run("Options...", "iterations=1 count=1 do=Nothing");

run("Dilate");

run("Dilate");

run("Dilate");

/* Section 6: thresholding rhino and nuage signal

*/

open(input+File.separator+rhi);

run("Subtract Background...", "rolling=50");

getStatistics(area, mean, min, max, std);

threshold = mean + 3*std;

setThreshold(0, threshold);

setOption("BlackBackground", false);

run("Make Binary", "thresholded remaining black");

run("Convert to Mask");

open(input+File.separator+nuage);

run("Subtract Background...", "rolling=50");

getStatistics(area, mean, min, max, std);

threshold = mean + 3*std;

setThreshold(0, threshold);

setOption("BlackBackground", false);

run("Make Binary", "thresholded remaining black");

run("Convert to Mask");

/* Section 7: Identifying peripheral rhino and nuage marker

*/

// creating images of just peripheral rhino and nuage marker.

imageCalculator("AND create", rhi, nup);

selectWindow("Result of "+rhi);

saveAs("Tiff", output+File.separator+Directory+File.separator+date+"peripheral_raw_"+rhi);

imageCalculator("AND create", nuage, nup);

selectWindow("Result of "+nuage);

saveAs("Tiff", output+File.separator+Directory+File.separator+date+"peripheral_raw_"+nuage);

// merging thresholded raw data for rhino and nuage marker

run("Merge Channels...", "c1=["+date+"peripheral_raw_"+nuage+"] c2="+date+"peripheral_raw_"+rhi+" create keep");

selectWindow("Composite");

saveAs("Jpeg", output+File.separator+Directory+File.separator+date+prefix+"composite_raw.jpg");

close();

/* Section 8: measuring overlap between Rhino and nuage marker with thresholded data

*/

// preparing rhino and nuage signals for examsion by getting rid of isolated pixels,

// picking and adding Rhino particles to region of interests (ROIs) and

// measruing nuage signal for each RIO with no expansion.

selectWindow(date+"peripheral_raw_"+rhi);

run("Close-");

run("Open");

run("Analyze Particles...", "size=5-Infinity pixel exclude summarize add");

if (roiManager("count") >= 1){

run("Set Measurements...", "area mean standard min area_fraction redirect=None decimal=3");

selectWindow(date+"peripheral_raw_"+nuage);

run("Close-");

run("Open");

run("Analyze Particles...", "size=5-Infinity pixel exclude summarize");

roiManager("Measure");

selectWindow ("Results");

saveAs("Results", output+File.separator+Directory+File.separator+date+prefix+"results_ex0.csv");

run("Close");

// saving composite image of no expansion

run("Merge Channels...", "c1=["+date+"peripheral_raw_"+nuage+"] c2="+date+"peripheral_raw_"+rhi+" create keep");

selectWindow("Composite");

saveAs("Jpeg", output+File.separator+Directory+File.separator+date+prefix+"composite_ex0.jpg");

close();

/* Section 9: iterations of expanding nuage signal and measuring signal in RIOs

*/

// expansion #1, measure overlap and save composite

selectWindow(date+"peripheral_raw_"+nuage);

run("Select None");

run("Dilate");

run("Analyze Particles...", "size=5-Infinity pixel exclude summarize");

roiManager("Measure");

selectWindow ("Results");

saveAs("Results", output+File.separator+Directory+File.separator+date+prefix+"results_ex1.csv");

run("Close");

run("Merge Channels...", "c1=["+date+"peripheral_raw_"+nuage+"] c2="+date+"peripheral_raw_"+rhi+" create keep");

selectWindow("Composite");

saveAs("Jpeg", output+File.separator+Directory+File.separator+date+prefix+"composite_ex1.jpg");

close();

// expansion #2, measure overlap and save composite

selectWindow(date+"peripheral_raw_"+nuage);

run("Select None");

run("Dilate");

run("Analyze Particles...", "size=5-Infinity pixel exclude summarize");

roiManager("Measure");

selectWindow ("Results");

saveAs("Results", output+File.separator+Directory+File.separator+date+prefix+"results_ex2.csv");

run("Close");

run("Merge Channels...", "c1=["+date+"peripheral_raw_"+nuage+"] c2="+date+"peripheral_raw_"+rhi+" create keep");

selectWindow("Composite");

saveAs("Jpeg", output+File.separator+Directory+File.separator+date+prefix+"composite_ex2.jpg");

close();

// expansion #3, measure overlap and save composite

selectWindow(date+"peripheral_raw_"+nuage);

run("Select None");

run("Dilate");

run("Analyze Particles...", "size=5-Infinity pixel exclude summarize");

roiManager("Measure");

selectWindow ("Results");

saveAs("Results", output+File.separator+Directory+File.separator+date+prefix+"results_ex3.csv");

run("Close");

run("Merge Channels...", "c1=["+date+"peripheral_raw_"+nuage+"] c2="+date+"peripheral_raw_"+rhi+" create keep");

selectWindow("Composite");

saveAs("Jpeg", output+File.separator+Directory+File.separator+date+prefix+"composite_ex3.jpg");

close();

// expansion #4, measure overlap and save composite

selectWindow(date+"peripheral_raw_"+nuage);

run("Select None");

run("Dilate");

run("Analyze Particles...", "size=5-Infinity pixel exclude summarize");

roiManager("Measure");

selectWindow ("Results");

saveAs("Results", output+File.separator+Directory+File.separator+date+prefix+"results_ex4.csv");

run("Close");

run("Merge Channels...", "c1=["+date+"peripheral_raw_"+nuage+"] c2="+date+"peripheral_raw_"+rhi+" create keep");

selectWindow("Composite");

saveAs("Jpeg", output+File.separator+Directory+File.separator+date+prefix+"composite_ex4.jpg");

close();

// expansion #5, measure overlap and save composite

selectWindow(date+"peripheral_raw_"+nuage);

run("Select None");

run("Dilate");

run("Analyze Particles...", "size=5-Infinity pixel exclude summarize");

roiManager("Measure");

selectWindow ("Results");

saveAs("Results", output+File.separator+Directory+File.separator+date+prefix+"results_ex5.csv");

run("Close");

run("Merge Channels...", "c1=["+date+"peripheral_raw_"+nuage+"] c2="+date+"peripheral_raw_"+rhi+" create keep");

selectWindow("Composite");

saveAs("Jpeg", output+File.separator+Directory+File.separator+date+prefix+"composite_ex5.jpg");

close();

// expansion #6, measure overlap and save composite

selectWindow(date+"peripheral_raw_"+nuage);

run("Select None");

run("Dilate");

run("Analyze Particles...", "size=5-Infinity pixel exclude summarize");

roiManager("Measure");

selectWindow ("Results");

saveAs("Results", output+File.separator+Directory+File.separator+date+prefix+"results_ex6.csv");

run("Close");

run("Merge Channels...", "c1=["+date+"peripheral_raw_"+nuage+"] c2="+date+"peripheral_raw_"+rhi+" create keep");

selectWindow("Composite");

saveAs("Jpeg", output+File.separator+Directory+File.separator+date+prefix+"composite_ex6.jpg");

close();

// save summary file after all espansions for each z section

selectWindow ("Summary");

saveAs("Results", output+File.separator+Directory+File.separator+date+prefix+"summary.csv");

run("Close");

}

}

setBatchMode(false)
